# Supplementary material for: Consensus on Assessments and Reassessment Frequency for Home-Based Therapeutic Exercise in Spinal Cord Injury: A Delphi Study.
Source: Research Square preprint supplement (doi:10.21203/rs.3.rs-7998101/v1), 2026-01-13
Supplement: Supplementary file 1 [file c67396129db1fadfa0e0182b.docx]

**Supplementary 1. Recommendations for Conducting the Reporting DEphi Studies (CREDES).**

| **Recommendations** | **Page** |
| --- | --- |
| **Rationale for the choice of the Delphi technique** |  |
| **1. Justification. The choice of the Delphi technique as a method of systematically collating expert consultation and building consensus needs to be well justified. When selecting the method to answer a particular research question, it is important to keep in mind its constructivist nature** | **p.3-4 (Ethical considerations, Study design, Steering Committee)** |
| **Planning and design** |  |
| **2. Planning and process. The Delphi technique is a flexible method and can be adjusted to the respective research aims and purposes. Any modifications should be justified by a rationale and be applied systematically and rigorously** | **p.4, 6-7**  **(Study design, Recruitment, Delphi procedures)** |
| **3. Definition of consensus. Unless not reasonable due to the explorative nature of the study, an a priori criterion for consensus should be defined. This includes a clear and transparent guide for action on (a) how to proceed with certain items or topics in the next survey round, (b) the required threshold to terminate the Delphi process and (c) procedures to be followed when consensus is (not) reached after one or more iterations** | **p.6-7**  **(Data collection and analysis)** |
| **Study conduct** |  |
| **4. Informational input. All material provided to the expert panel at the outset of the project and throughout the Delphi process should be carefully reviewed and piloted in advance in order to examine the effect on experts’ judgements and to prevent bias** | **p.6**  **(Delphi procedures)** |
| **5. Prevention of bias. Researchers need to take measures to avoid directly or indirectly influencing the experts’ judgements. If one or more members of the research team have a conflict of interest, entrusting an independent researcher with the main coordination of the Delphi study is advisable** | **p.3-4**  **(Ethical considerations)** |
| **6. Interpretation and processing of results. Consensus does not necessarily imply the ‘correct’ answer or judgement; (non)consensus and stable disagreement provide informative insights and highlight differences in perspectives concerning the topic in question** | **p.9-12**  **(Discussion)** |
| **7. External validation. It is recommended to have the final draft of the resulting guidance on best practice in palliative care reviewed and approved by an external board or authority before publication and dissemination** | **Not included** |
| **Reporting** |  |
| **8. Purpose and rationale. The purpose of the study should be clearly defined and demonstrate the appropriateness of the use of the Delphi technique as a method to achieve the research aim. A rationale for the choice of the Delphi technique as the most suitable method needs to be provided** | **p.2-3**  **(Introduction)** |
| **9. Expert panel. Criteria for the selection of experts and transparent information on recruitment of the expert panel, sociodemographic details including information on expertise regarding the topic in question, (non)response and response rates over the ongoing iterations should be reported** | **p.4-5, 8 (Participants, Results)**  **and Table 1** |
| **10. Description of the methods. The methods employed need to be comprehensible; this includes information on preparatory steps (How was available evidence on the topic in question synthesised?), piloting of material and survey instruments, design of the survey instrument(s), the number and design of survey rounds, methods of data analysis, processing and synthesis of experts’ responses to inform the subsequent survey round and methodological decisions taken by the research team throughout the process** | **p.4-8**  **(Study design, Recruitment, Delphi procedures, Data collection and analysis)** |
| **11. Procedure. Flow chart to illustrate the stages of the Delphi process, including a preparatory phase, the actual ‘Delphi rounds’, interim steps of data processing and analysis, and concluding steps** | **Figure 1** |
| **12. Definition and attainment of consensus. It needs to be comprehensible to the reader how consensus was achieved throughout the process, including strategies to deal with non-consensus** | **p.7**  **(Data collection and analysis)** |
| **13. Results. Reporting of results for each round separately is highly advisable in order to make the evolving of consensus over the rounds transparent. This includes figures showing the average group response, changes between rounds, as well as any modifications of the survey instrument such as deletion, addition or modification of survey items based on previous rounds** | **p.8-9 (Results), Table 2-4, Figure 2, and supplementary 3** |
| **14. Discussion of limitations. Reporting should include a critical reflection of potential limitations and their impact of the resulting guidance** | **p.9-13**  **(Discussion, Strengths and Limitations)** |
| **15. Adequacy of conclusions. The conclusions should adequately reflect the outcomes of the Delphi study with a view to the scope and applicability of the resulting practice guidance** | **p.13-14**  **(Conclusion)** |
| **16. Publication and dissemination. The resulting guidance on good practice in palliative care should be clearly identifiable from the publication, including recommendations for transfer into practice and implementation. If the publication does not allow for a detailed presentation of either the resulting practice guidance or the methodological features of the applied Delphi technique, or both, reference to a more detailed presentation elsewhere should be made (e.g. availability of the full guideline from the authors or online; publication of a separate paper reporting on methodological details and particularities of the process (e.g. persistent disagreement and controversy on certain issues)). A dissemination plan should include endorsement of guidance by professional associations and health care authorities to facilitate implementation** | **p.13-14**  **(Conclusion)** |

**Supplement 2. Questionnaire for the First Round**

**Question 1: How strongly do you agree in acquiring the following information prior to conducting the physical assessment for prescribing an exercise intervention in individuals with SCI?**

Please indicate your level of agreement with each statement, where 1 is "Strongly Disagree" and 5 is "Strongly Agree". If you are not familiar with an assessment item, please select "No answer”.

Pre-physical Assessment

1. **Demographics**
2. Age
3. Gender
4. Race
5. Education
6. Financial position
7. **Medical History**
8. Date of spinal cord injury
9. Cause of spinal cord injury
10. Primary condition and medical management of spinal cord injury
11. Secondary conditions associated with spinal cord injury
12. Past medical history or comorbidities
13. **Drug History**
14. **Social History**

e.g., employment/education, accommodation, family, hobbies/exercise activities

1. **Type of Injury Limitation** (whether exercise is safe due to the injury)

e.g., unstable fractures, instability issues, fixations

1. **Skin Integrity**

e.g., wound location and area (width x length x depth), severity and grade of pressure sore

1. **Patient’s Treatment Goals**
2. **Other Information to be Acquired Prior to Physical Assessments?**

Is there any other important information that is not listed above? If so, please provide it below. (Open question)

**Question 2: After an individual is cleared from the point of spinal stability, how strongly do you agree that the following assessments are important for prescribing an exercise intervention to improve physical function in individuals with SCI?**

Physical Assessment

1. **Neuromusculoskeletal Assessment**
   1. The ISNCSCI neurological level of injury and classification
   2. Full Oxford Scale Muscle Chart
   3. AIS motor scores
   4. AIS sensory scores (pinprick and light touch)
   5. Proprioception (joint position sense / kinesthesia/ sense of force and velocity change)
   6. Muscle tone
   7. Reflexes
2. **Range of Movement for Each Joint Affected by Injury**
3. **Joint Play for Joints Affected by Injury**

e.g., shoulder subluxation, other subluxation joints need to avoid over-stretch

1. **Upper Limb and Hand Function**

e.g., grasping, dexterity

1. **Functional Mobility**

e.g., bed mobility / lying to sitting / sitting to standing / transfer / self-propelling/ wheelchair mobility/ other functional ability

1. **Balance (including sitting and standing, static and dynamic)**
2. **Ambulation Assessment and Use of Assistive Device**

e.g., walking ability, such as WISCII, and use of assistive devices, such as foot orthosis and walking frame

1. **Gait Analysis**
2. **Cardiorespiratory function and fitness**

e.g., respiratory function, pattern of breathing, cough function

e.g., tolerance of patients determines the aerobic intensity (low, moderate, high), mode (intermittent, continuous), and progression (increasing duration or intensity)

1. **Pain**

e.g., type of pain (sharp, dull, throbbing), intensity (1-10), location (lower extremities, trunk, shoulder), and patterns of presentation.

1. **Communication - Vision or Hearing Impairments (Pre-existing or Newly Acquired)**

e.g., visual or auditory impairments influence how exercise instructions are given and the need for patient interaction

1. **Communication - Difficulties with Speech, or Language Comprehension**

e.g., speech clarity and language comprehension influence how exercise instructions are given and the need for patient interaction

1. **Other Physical Assessments to be Performed?**

Are there any other important assessments that are not listed above? If so, please provide it below. (Open question)

**Question 3: How strongly do you agree that the following additional assessments of function or medical conditions need to be assessed in conjunction with the above physical assessments to prescribe an exercise intervention for individuals with SCI?**

Cognitive and Psychological Assessment

1. **Confusion / Disorientation**

e.g., the patient may not recognize where they are, even if in a familiar setting

e.g., dementia, delirium

1. **Slowed Thinking and Processing of Information**

e.g., the patient may take longer to solve problems or come up with solutions, even for familiar tasks.

e.g., the patient has difficulty managing more than one task at a time and needs to fully complete one task before starting another

1. **Memory Problems**

e.g., the patient with short-term memory impairment makes patient hard to recall recent events or information, such as instructions for exercise.

1. **Poor Motivation / Agitation**

e.g., the patient stops engaging in activities they once enjoyed, such as exercises.

e.g., the patient becomes easily annoyed or frustrated during exercise.

1. **Mental Health Issues**

e.g., anxiety, depression, post-traumatic stress

e.g., psychiatric treatment, alcohol and drug abuse, self-harm or suicide attempts, violent crime

1. **Other Cognitive and Psychological Assessment**

Are there any other important assessments that are not listed above? If so, please provide it below. (Open question)

Precautions or Contraindications for Exercise

1. **Unstable Vital Signs**

e.g., autonomic dysreflexia, orthostatic hypotension

e.g., unable blood pressure, exaggerated heart rate, tachypnea, low oxygen saturation, high body temperature

1. **Bowel & Bladder management**
2. **Signs of Infections**

e.g., fever, chills, increased pain, pustules or abscesses

1. **Thromboembolism**

e.g., deep vein thrombosis in the lower extremity, pulmonary embolism

1. **Risk Factors**

e.g., cardiovascular disease, diabetes mellitus

e.g., factors such as a history of falls, osteoporosis, home hazards, and a review of medications (e.g., cardiovascular disease) determine the fall prevention strategies and set-up during exercise

e.g., frequency of dizziness and other vestibular symptoms (e.g. benign paroxysmal positional vertigo) results of patients affect the selection of balance exercise types

1. **Other Precautions or Contraindications**

Are there any other important relative contraindications that are not listed above? If so, please provide it below. (Open question)

**Question 3: How strongly do you agree that the following additional assessments of function or medical conditions need to be assessed in conjunction with the above physical assessments to prescribe an exercise intervention for individuals with SCI?**

Cognitive and Psychological Assessment

1. **Confusion / Disorientation**

e.g., the patient may not recognize where they are, even if in a familiar setting

e.g., dementia, delirium

1. **Slowed Thinking and Processing of Information**

e.g., the patient may take longer to solve problems or come up with solutions, even for familiar tasks.

e.g., the patient has difficulty managing more than one task at a time and needs to fully complete one task before starting another

e.g., mental retardation

1. **Memory Problems**

e.g., the patient with short-term memory impairment makes patient hard to recall recent events or information, such as instructions for exercise.

1. **Poor Motivation / Agitation**

e.g., the patient stops engaging in activities they once enjoyed, such as exercises.

e.g., the patient becomes easily annoyed or frustrated during exercise.

1. **Mental Health Issues**

e.g., anxiety, depression, post-traumatic stress

e.g., psychiatric treatment, alcohol and drug abuse, self-harm or suicide attempts, violent crime

1. **Other Cognitive and Psychological Assessment**

Are there any other important assessments that are not listed above? If so, please provide it below. (Open question)

Precautions or Contraindications for Exercise

1. **Unstable Vital Signs**

e.g., autonomic dysreflexia, orthostatic hypotension

e.g., unable blood pressure, exaggerated heart rate, tachypnea, low oxygen saturation, high body temperature

1. **Bowel & Bladder management**
2. **Signs of Infections**

e.g., fever, chills, increased pain, pustules or abscesses

1. **Thromboembolism**

e.g., deep vein thrombosis in the lower extremity, pulmonary embolism

1. **Risk Factors**

e.g., cardiovascular disease, diabetes mellitus

e.g., factors such as a history of falls, osteoporosis, home hazards, and a review of medications (e.g., cardiovascular disease) determine the fall prevention strategies and set-up during exercise

e.g., frequency of dizziness and other vestibular symptoms (e.g. benign paroxysmal positional vertigo) results of patients affect the selection of balance exercise types

1. **Other Precautions or Contraindications**

Are there any other important relative contraindications that are not listed above? If so, please provide it below. (Open question)

Thank you for your participation. We will compile and analyze the collected data and provide a summary of the findings in the next round of this Delphi study. Your contributions are greatly appreciated.

**Questionnaire for the Second Round**

Based on the reply from the first round, we have identified key assessment items that were considered important. In the second round, we will delve deeper into the frequency of these assessments.

New question for the second round:

**How often would you suggest acquiring the following information or conducting these assessments to prescribe exercise interventions for individuals with spinal cord injury (SCI)?**

**Supplementary 3. The items did not reach a consensus from the survey ratings of the importance of assessment items for exercise prescription**

| Section | Item | Median | IQR | Agreement percentage (%) |
| --- | --- | --- | --- | --- |
| Pre-Physical | **Previous experience of exercise and expectations of exercise** | 4 | 1.25 | 100 |
| **Sleep hygiene** | 4 | 1.25 | 100 |
| **Caregiver’s or relative’s goals** | 3 | 1 | 85.71 |
| Physical | **Handheld myometry** | 3 | 1 | 100 |
| **Reflexes** | 3 | 2 | 71.43 |
| Other-Cognitive and Psychological | **Neurodivergence (e.g. autism spectrum disorder)** | 4 | 1.25 | 100 |

IQR = interquartile range
